# Supplementary material for: A Systematic Study of the Effect of Different Molecular Weights of Hyaluronic Acid on Mesenchymal Stromal Cell-Mediated Immunomodulation
Source: PubMed Central journal article supplement (PMC4731468; doi:10.1371/journal.pone.0147868), 2016-01-28
Supplement: pone.0147868.s001.pdf [file pone.0147868.s001.pdf]

$$\log(\text{Measurement}) = \beta_0 + \text{Donor} \cdot (\text{MSC: responder ratio}) \cdot \beta_1 + \text{HAtype} \cdot \beta_2 + (\text{IFNsupplementation}) \cdot \beta_3$$

**Equation 1:** General linear model equation used for statistical analysis.  $\beta_x$ , parameters to be estimated. Variables within parenthesis were included where needed.
