# Supplementary material for: A Systematic Study of the Effect of Different Molecular Weights of Hyaluronic Acid on Mesenchymal Stromal Cell-Mediated Immunomodulation
Source: PubMed Central journal article supplement (PMC4731468; doi:10.1371/journal.pone.0147868), 2016-01-28
Supplement: pone.0147868.s004.pdf [file pone.0147868.s004.pdf]

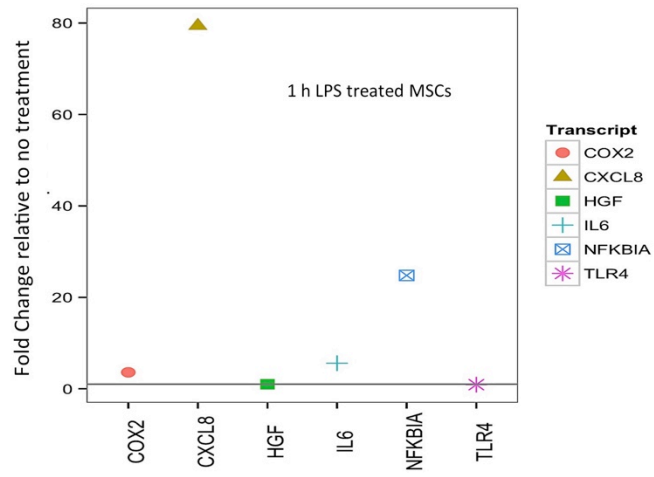

**Figure 3:** Gene expression in MSCs after 1 hour exposure to 100 ng/ml LPS. Line indicated basal transcript levels (fold change=1).
