# Supplementary material for: A Systematic Study of the Effect of Different Molecular Weights of Hyaluronic Acid on Mesenchymal Stromal Cell-Mediated Immunomodulation
Source: PubMed Central journal article supplement (PMC4731468; doi:10.1371/journal.pone.0147868), 2016-01-28
Supplement: pone.0147868.s007.pdf [file pone.0147868.s007.pdf]

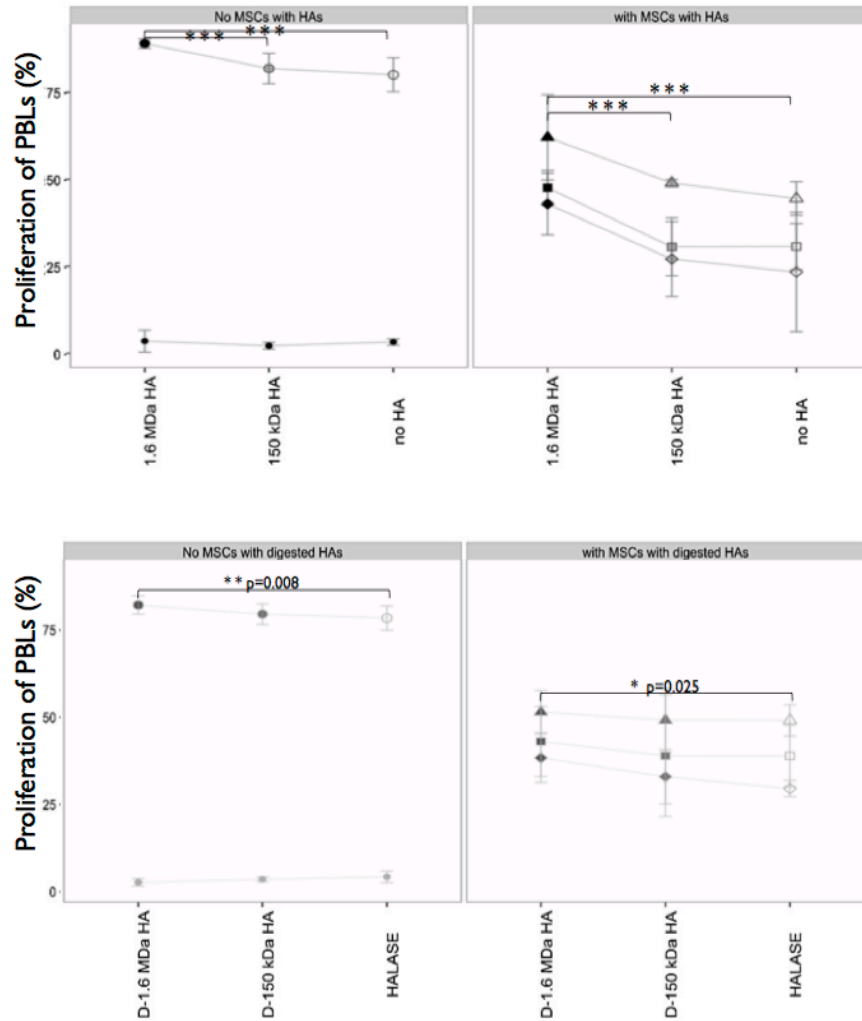

**Figure 6:** Proliferation of PBLs in medium containing HAs (Top) or Hyaluronidase-digested HAs (Bottom) with or without MSCs. • indicate resting PBMCs; ○ Activated PBLs (PBMCs alone); □ MSC donor1, ◇ donor 2, and △ donor 3. Error bars indicate 95% CI. \*  $p < 0.05$ , \*\*  $< 0.01$  and \*\*\*  $< 0.001$ .
