# Supplementary material for: A Systematic Study of the Effect of Different Molecular Weights of Hyaluronic Acid on Mesenchymal Stromal Cell-Mediated Immunomodulation
Source: PubMed Central journal article supplement (PMC4731468; doi:10.1371/journal.pone.0147868), 2016-01-28
Supplement: pone.0147868.s008.pdf [file pone.0147868.s008.pdf]

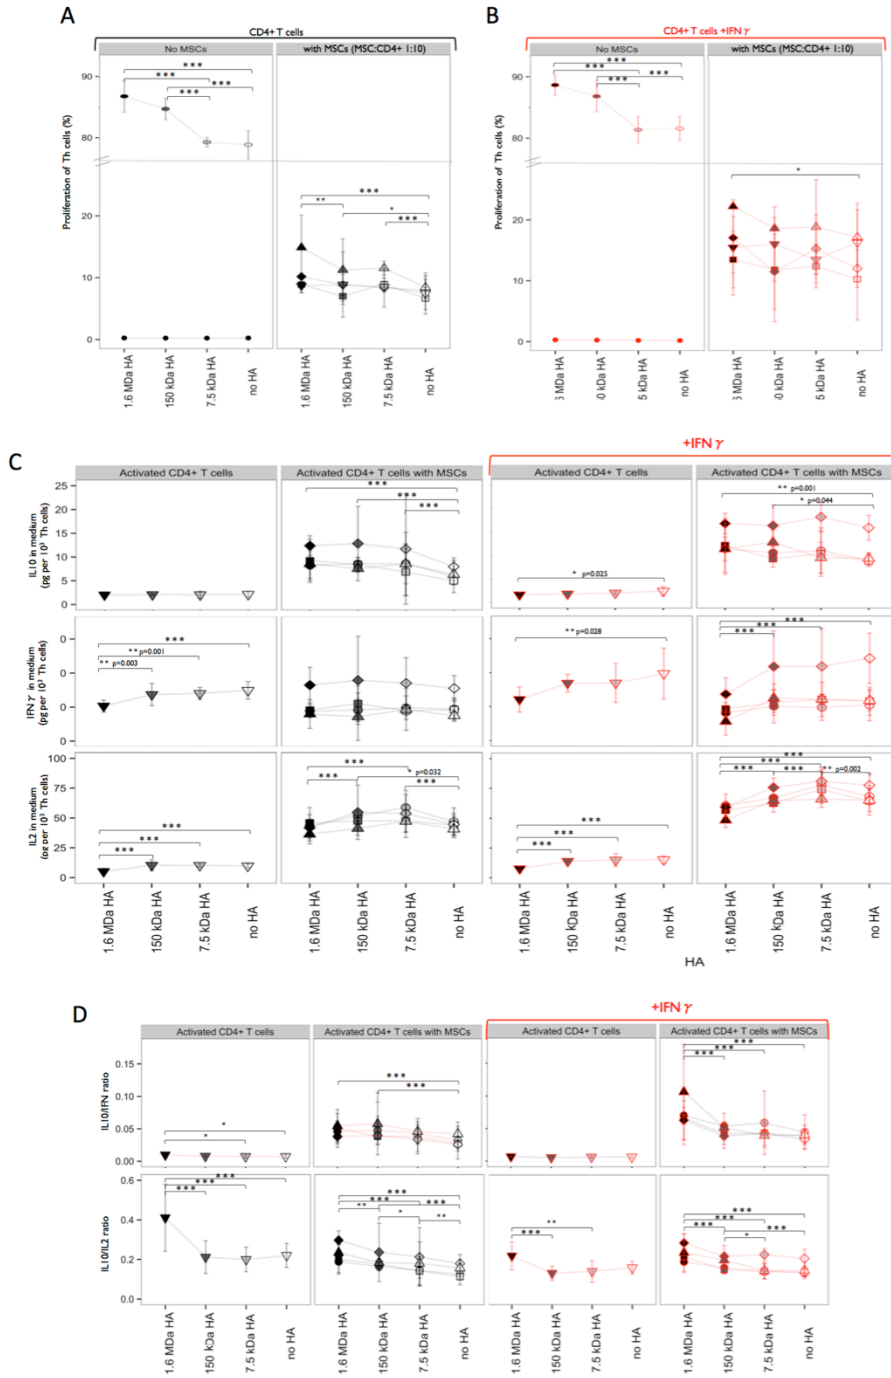

**Figure 7:** Effect of HAs on the interaction of MSCs and Th (CD4+ T cells) cells. (A) and (B) Proliferation measurements are shown as the level of daughter cells from the whole Th cell population. (E) IL10, IFN $\gamma$  and IL2 levels in medium from Activated Th cells with or without MSCs and with or without IFN $\gamma$  in medium. (F) Ratios of IL10/IFN $\gamma$ , IL10/IL2 and IFN $\gamma$ /IL2.  $\circ$  Th cells alone, resting cells shown in dark small shape ( $\bullet$ );  $\square$  MSC sample 1,  $\diamond$  sample 2,  $\nabla$  sample 3 and  $\triangle$  sample 4. Shapes filled with black stand for 1.6 MDa HA; dark gray, 150 kDa HA; light gray, 7.5 kDa HA and white, no HA. Each shape/dot indicates the mean of three or four (with no MSCs) experimental replicates with error bars representing 95% CI. \*  $p < 0.05$ , \*\*  $p < 0.01$  and \*\*\*  $< 0.001$ .
