# Supplementary material for: A Systematic Study of the Effect of Different Molecular Weights of Hyaluronic Acid on Mesenchymal Stromal Cell-Mediated Immunomodulation
Source: PubMed Central journal article supplement (PMC4731468; doi:10.1371/journal.pone.0147868), 2016-01-28
Supplement: pone.0147868.s009.pdf [file pone.0147868.s009.pdf]

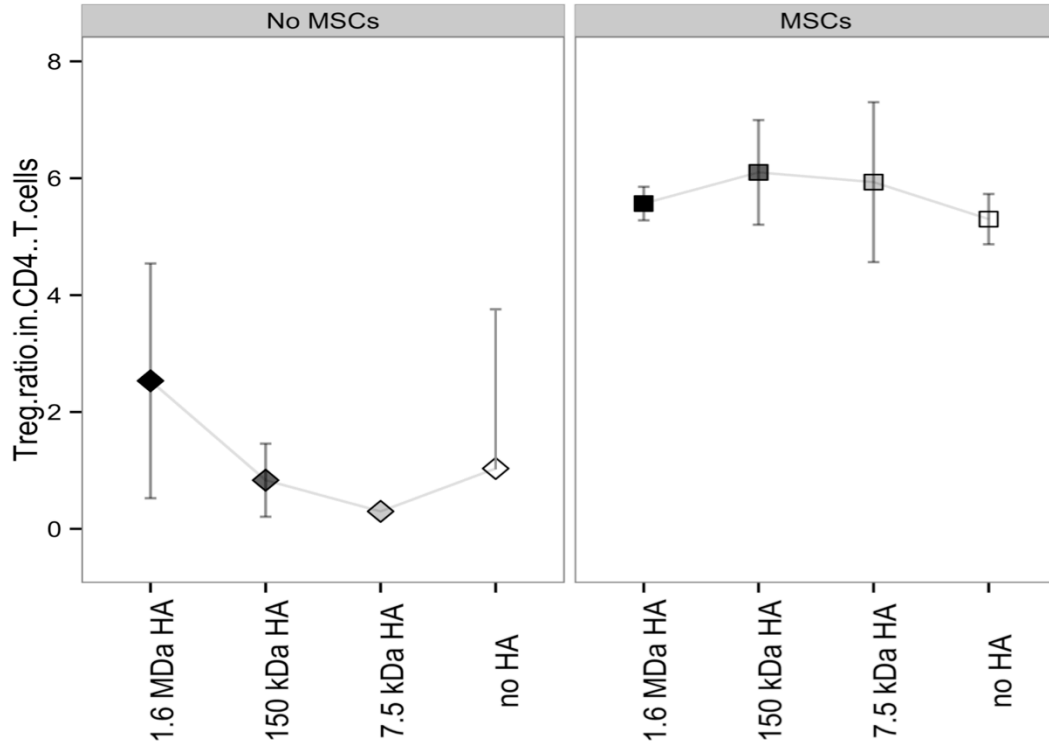

**Figure 8:** Effect of HAs on the MSC mediated induction of Tregs. Frequency of Tregs (CD25+CD127-) within CD4+ T cells is shown.  $\diamond$  CD4+ T cells alone;  $\square$  CD4+ T cells and MSCs. Shapes filled with black stand for 1.6 MDa HA; dark gray, digested-(D) 1.6 MDa HA or 150 kDa HA; light gray, 7.5 kDa HA and white, no HA. Each shape/dot indicates the mean of three experimental replicates with error bars representing 95% CI. \*  $p < 0.05$ , \*\*  $p < 0.01$  and \*\*\*  $< 0.001$ .
