# Supplementary material for: A Systematic Study of the Effect of Different Molecular Weights of Hyaluronic Acid on Mesenchymal Stromal Cell-Mediated Immunomodulation
Source: PubMed Central journal article supplement (PMC4731468; doi:10.1371/journal.pone.0147868), 2016-01-28
Supplement: pone.0147868.s011.pdf [file pone.0147868.s011.pdf]

**Table 1: Primer nucleotide sequences of the tested transcripts**

| Function                              | Transcript      | Forward                        | Reverse                       |
|---------------------------------------|-----------------|--------------------------------|-------------------------------|
| <i>HA receptor</i>                    | <b>CD44</b>     | CGT GGA ATA CAC CTG CAA AG     | CGG ACA CCA TGG ACA AGT TT    |
| <i>Trophic</i>                        | <b>IL6</b>      | TCT CCA CAA GCG CCT TCG        | CTC AGG GCT GAG ATG CCG       |
| <i>Anti-inflammatory</i>              | <b>COX2</b>     | ATA AGC GAG GGC CAG CTT TC     | CGC AGT TTA CGC TGT CTA GC    |
| <i>Chondrogenic</i>                   | <b>SOX9</b>     | ATG CAA GCA TGT GTC ATC CA     | AGG TCT GTC AGT GGG CTG AT    |
| <i>Joint lubricant</i>                | <b>PRG4</b>     | AGG CCC CAT GTG TTC ATG C      | GCG CAA AGT AGT CAG TCC ATC T |
| <i>HA fragments receptor?</i>         | <b>TLR4</b>     | TGA GCA GTC GTG CTG GTA        | CAG GGC TTT TCT GAG TCG       |
| <i>HA receptor</i>                    | <b>ICAM1</b>    | AGG GTA AGG TTC TTG CCC AC     | TGA TGG GCA GTC AAC AGC TA    |
| <i>Proliferation</i>                  | <b>CYCLIND1</b> | ACC TGG ATG CTG GAG GTC T      | GCT CCA TTT GCA GCA GCT C     |
| <i>Pro-inflammatory</i>               | <b>NFKBIA</b>   | TCA TGG ATG ATG GCC AAG T      | GTC AAG GAG CTG CAG GAG AT    |
| <i>Angiogenic, chemotactic</i>        | <b>CXCL8</b>    | AAA TTT GGG GTG GAA AGG TT     | TCC TGA TTT CTG CAG CTC TGT   |
| <i>Chondrolysis</i>                   | <b>MMP3</b>     | CAA AGC TTC AGT GTT GGC TG     | GGC CAG GGA TTA ATG GAG AT    |
| <i>Chondrogenic</i>                   | <b>ACAN</b>     | ACT CTG GGT TTT CGT GAC TCT    | ACA CTC AGC GAG TTG TCA TGG   |
| <i>Angiogenic, chondrolysis</i>       | <b>VEGFA</b>    | CTA CCT CCA CCA TGC CAA GT     | AGC TGC GCT GAT AGA CAT CC    |
| <i>Anti-inflammatory</i>              | <b>PDL1</b>     | TCA ATG CCC CAT ACA ACA A      | TGC TTG TCC AGA TGA CTT CG    |
| <i>Anti-inflammatory</i>              | <b>PDL2</b>     | GTA CAT AAT AGA GCA TGG CAG CA | CCA CCT TTT GCA AAC TGG CTG T |
| <i>Anti-inflammatory, trophic</i>     | <b>HGF</b>      | TGG TTT TAA TGA AGC TTG CCA G  | GAG ATG TGC CAC TCG TAA TAG G |
| <i>Anti-inflammatory Chondrogenic</i> | <b>TGFβ</b>     | ACT GCG GAT CTC TGT GTC AT     | AGT AGT GTT CCC CAC TGG TCC   |
| <i>Anti-inflammatory</i>              | <b>TSG6</b>     | AGC ACG GTC TGG CAA ATA CA     | ATC CAT CCA GCA GCA CAG AC    |
| <i>Anti-inflammatory</i>              | <b>IDO</b>      | GCC CTT CAA GTG TTT CAC CAA    | CCA GCC AGA CAA ATA TAT GCG A |
| <i>Chondrogenic</i>                   | <b>COL2A1</b>   | GTC CTC TGC GAC GAC ATA ATC    | CCT TGA TGT CTC CAG GTT CTC C |
| <i>Anti-inflammatory</i>              | <b>IL1RA</b>    | AGC ATG AGG CTC AAT GGG TA     | AAA TCC AGC AAG ATG CAA GC    |
| <i>Anti-inflammatory</i>              | <b>IL10</b>     | CGAGATGCCTTCAGCAGAGT           | CGCCTTGATGTCTGGGTCTT          |
| <i>Pro-inflammatory</i>               | <b>TNF</b>      | GCC AGA GGG CTG ATT AGA GA     | TCA GCC TCT TCT CCT TCC TG    |
| <i>Pro-inflammatory</i>               | <b>CXCL13</b>   | CAA TGA AGC GTC TAG GGA TAA AG | CAG TCC AAG GTG TTC TGG       |
| <i>Chondrolysis</i>                   | <b>MMP13</b>    | TCA CCA ATT CCT GGG AAG TCT    | TCA GGA AAC CAG GTC TGG AG    |
| <i>Housekeeping Gene</i>              | <b>B2M</b>      | CTC CGT GGC CTT AGC TGT G      | TTT GGA GTA CGC TGG ATA GCC T |

Interleukin 6, IL6; sex determining region Y-box 9, SOX9; Proteoglycan 4, PRG4; Toll-like receptor 4, TLR4; Intercellular adhesion molecule 1, ICAM1; Twist-related protein 1, TWIST1; nuclear factor of kappa light polypeptide gene enhancer in B-cells inhibitor, alpha, NFKBIA; Interleukin 8, CXCL8; matrix metalloproteinase-3 and 1, MMP-3 and -13; Aggrecan, ACAN; Vascular endothelial growth factor alpha, VEGFA; Programmed death-ligand 1 and 2, PDL1 and PDL2; Hepatocyte growth factor, HGF; Transforming growth factor beta, TGFβ; Tumor necrosis factor-inducible gene 6 protein, TSG6; indoleamine 2,3-dioxygenase, IDO; Collagen type II alpha 1, COL2A1; Tumour necrosis factor alpha; TNF; chemokine ligand 13, CXCL13.
